# Supplementary material for: Small RNA Expression from the Human Macrosatellite DXZ4
Source: PubMed Central journal article supplement (PMC4199704; doi:10.1534/g3.114.012260), 2014-08-21
Supplement: supp_g3.114.012260_FigureS3.pdf [file supp_g3.114.012260_FigureS3.pdf]

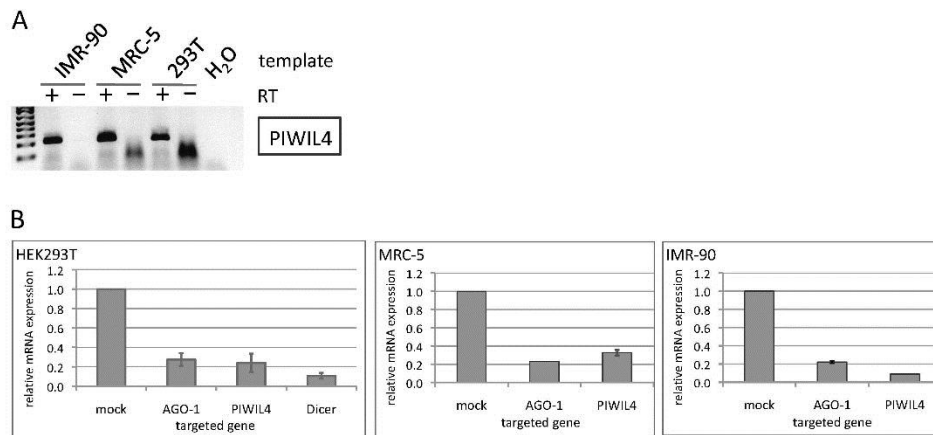

**Figure S3 Efficiencies of RNAi-mediated depletion of small RNA pathway factors.** (A) Representative example of RT-PCR to detect PIWIL4 expression in human fibroblasts. cDNA syntheses were carried out in the presence (+RT) or absence (-RT) of reverse transcriptase. (B) Quantitative RT-PCR of mRNA expression levels of AGO-1, PIWIL4, and Dicer after transfection of siRNAs targeting the respective gene. Data from  $n \leq 6$  (HEK293T) and  $n = 1-2$  (MRC-5, IMR-90) independent experiments.
