# Supplementary material for: Small RNA Expression from the Human Macrosatellite DXZ4
Source: PubMed Central journal article supplement (PMC4199704; doi:10.1534/g3.114.012260), 2014-08-21
Supplement: supp_g3.114.012260_FigureS4.pdf [file supp_g3.114.012260_FigureS4.pdf]

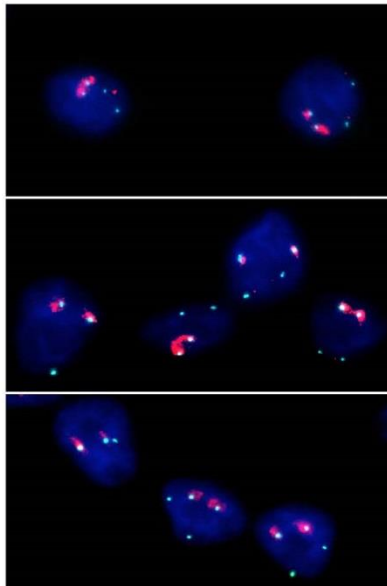

**Figure S4** Determination of the ratio of active X chromosomes versus total number of X chromosomes in HEK293T cells. Three examples of X chromosomes labeled by *DXZ4* DNA-FISH (cyan) combined with *XIST* RNA-FISH (red). Nuclear DNA was counterstained with DAPI (blue).
